# Supplementary material for: A multi-ice-core, annual-layer-counted Greenland ice-core chronology for the last 3800 years: GICC21
Source: Copernicus journal article supplement (doi:10.5194/cp-2021-155), 2021-11-17
Supplement: Supplementary file 1 [file cp-2021-155-supplement.zip]

Archive with 3 entries (3 files):
- GICC21_timescale_supplement.xlsx
- GICC21-Straticounter_preprocessing_supplement.xlsx
- Sinnl_et_al_GICC21_supplementary_information.pdf
