# Supplementary material for: A multi-ice-core, annual-layer-counted Greenland ice-core chronology for the last 3800 years: GICC21
Source: Copernicus journal article supplement (doi:10.5194/cp-2021-155), 2021-11-17
Supplement: Supplementary file 1 [file GICC21-Straticounter_preprocessing_supplement.xlsx]

## Sheet: Description
The GICC21 Straticounter preprocessing
This information is intended for those who wish to reproduce our results or as an example for how to apply the StratiCounter algorithm by counting on an ice core or sedimentary data.
Released XXX-ber YYth 2021
Please cite the accompanying paper when citing these data:
Sinnl, et al. "A multi-ice-core, annual-layer counted Greenland ice-core chronology for the last 3850 years: GICC21", 2021,
When using StratiCounter, please cite: Winstrup, M., Svensson, A. M., Rasmussen, S. O., Winther, O., Steig, E. J., & Axelrod, A. E. (2012). An automated approach for annual layer counting in ice cores. Climate of the Past, 8(6), 1881-1895. https://doi.org/10.5194/cp-8-1881-2012
Please state the full timescale name (Greenlandic Ice Core Chronology 2021) at least once in data files and work based on this time scale.
This file contains 8 sheets:
1) This documentation
2-8) Specific StratiCounter preprocessing settings for each ice core.
The algorithm can be found at https://github.com/maiwinstrup/StratiCounter
The algorithm was modified in this study by implementing a small alteration to the code, in order to be able to run adjacent sections of data without having to restart the algorithm from the top.
The modification is implemented by saving the probability information of the run and feeding the folder (Model.inputdir0) to the next adjacent run.
For more information, please contact the main author of GICC21.

## Sheet: EASTGRIP
EastGRIP GICC21 SC settings (Model.)
Run	icecore	dstart	dend	inputdir0	dx	dx_offset	nLayerBatch	manualtemplates		initialpar		nIter	nTemplate	species	preprocsteps{:,1}	preprocsteps{:,2}
1	Eastgrip	13.5	28.2	"	0.0095	0	40	13.5	24.777	13.5	28.2	4	2	Ca (CFA)	log minusmean	zscore,2
														Ca (ICP)	log minusmean	zscore,2
														DEP	log minusmean	zscore,2
														NH4	log minusmean	zscore,2
														NO3	log minusmean	zscore,2
														Na (CFA)	log minusmean	zscore,2
														Na (ICP)	log minusmean	zscore,2
2	Eastgrip	28.2	60.7	Output/Eastgrip/Timescale/13.5-28.2m/#5	0.0085	0	40	28.2	36.812	28.2	60.7	4	2	Ca (CFA)	log minusmean	zscore,2
														Ca (ICP)	log minusmean	zscore,2
														DEP	log minusmean	zscore,2
														NH4	log minusmean	zscore,2
														NO3	log minusmean	zscore,2
														Na (CFA)	log minusmean	zscore,2
														Na (ICP)	log minusmean	zscore,2
3	Eastgrip	60.7	100	Output/Eastgrip/Timescale/28.2-60.7m/#5	0.006	0	40	60.7	66.751	60.7	100	4	2	Ca (CFA)	log minusmean	zscore,2
														Ca (ICP)	log minusmean	zscore,2
														DEP	log minusmean	zscore,2
														NH4	log minusmean	zscore,2
														NO3	log minusmean	zscore,2
														Na (CFA)	log minusmean	zscore,2
														Na (ICP)	log minusmean	zscore,2
4	Eastgrip	100	250	Output/Eastgrip/Timescale/60.7-100m/#4	0.009	0	40	100	106.147	100	250	4	2	Ca (CFA)	log minusmean	zscore,2
														Ca (ICP)	log minusmean	zscore,2
														NH4	log minusmean	zscore,2
														NO3	log minusmean	zscore,2
														Na (CFA)	log minusmean	zscore,2
														Na (ICP)	log minusmean	zscore,2
5	Eastgrip	250	300	Output/Eastgrip/Timescale/100-250m/#2	0.0093	0	50	250	264.88	250	300	4	2	Ca (CFA)	log minusmean	zscore,2
														Ca (ICP)	log minusmean	zscore,2
														NH4	log minusmean	zscore,2
														NO3	log minusmean	zscore,2
														Na (CFA)	log minusmean	zscore,2
														Na (ICP)	log minusmean	zscore,2
6	Eastgrip	300	350	Output/Eastgrip/Timescale/250-300m/#1	0.0092	0	50	330.044	350	300	350	4	2	Ca (CFA)	log minusmean interpnans	zscore,2
														Ca (ICP)	log minusmean interpnans	zscore,2
														NH4	log minusmean interpnans	zscore,2
														NO3	log minusmean interpnans	zscore,2
														Na (CFA)	log minusmean interpnans	zscore,2
														Na (ICP)	log minusmean interpnans	zscore,2
7	Eastgrip	350	450	Output/Eastgrip/Timescale/300-350m/#1	0.006	0	40	350	383.967	350	450	4	2	Ca_350_905	log minusmean interpnans	zscore,2
														NH4+	log minusmean interpnans	zscore,2
														NO3-	log minusmean interpnans	zscore,2
														Na_350_905	log minusmean interpnans	zscore,2

## Sheet: NEEM
NEEM GICC21 SC settings (Model.)
Run	icecore	dstart	dend	inputdir0	dx	dx_offset	nLayerBatch	manualtemplates		initialpar		nIter	nTemplate	species	preprocsteps{:,1}	preprocsteps{:,2}
1	Neem	7.2	194	"	0.015	0	40	7.2	194	7.2	194	4	2	Ca	interpnans minusmean log	zscore, 2
														ECM	interpnans	zscore, 2
														NH4	interpnans minusmean log	zscore, 2
														NO3	interpnans minusmean log	zscore, 2
														Na	interpnans minusmean log	zscore, 2
2	Neem	194	242	Output/Neem/Timescale/7.2-194m/#1	0.015	0	40	197.651	199.805	194	242	4	2	Ca	interpnans minusmean log	zscore, 2
														ECM	interpnans	zscore, 2
														NH4	interpnans minusmean log	zscore, 2
														NO3	interpnans minusmean log	zscore, 2
														Na	interpnans minusmean log	zscore, 2
3	Neem	242	267.385	Output/Neem/Timescale/194-242m/#1	0.015	0	40	242	246.956	242	267.385	4	2	Ca	interpnans minusmean log	zscore, 2
														ECM	interpnans	zscore, 2
														NH4	interpnans minusmean log	zscore, 2
														NO3	interpnans minusmean log	zscore, 2
														Na	interpnans minusmean log	zscore, 2
4	Neem	267.385	292.769	Output/Neem/Timescale/242-267.3846m/#1	0.015	0	40	267.385	272.08	267.385	292.769	4	2	Ca	interpnans minusmean log	zscore, 2
														ECM	interpnans	zscore, 2
														NH4	interpnans minusmean log	zscore, 2
														NO3	interpnans minusmean log	zscore, 2
														Na	interpnans minusmean log	zscore, 2
5	Neem	292.769	318.154	Output/Neem/Timescale/267.3846-292.7692m/#1	0.015	0	40	292.769	297.546	292.769	318.154	4	2	Ca	interpnans minusmean log	zscore, 2
														ECM	interpnans	zscore, 2
														NH4	interpnans minusmean log	zscore, 2
														NO3	interpnans minusmean log	zscore, 2
														Na	interpnans minusmean log	zscore, 2
6	Neem	318.154	343.538	Output/Neem/Timescale/292.7692-318.1538m/#1	0.015	0	40	318.154	322.95	318.154	343.538	4	2	Ca	interpnans minusmean log	zscore, 2
														ECM	interpnans	zscore, 2
														NH4	interpnans minusmean log	zscore, 2
														NO3	interpnans minusmean log	zscore, 2
														Na	interpnans minusmean log	zscore, 2
7	Neem	343.538	368.923	Output/Neem/Timescale/318.1538-343.5385m/#1	0.015	0	40	343.538	348.446	343.538	368.923	4	2	Ca	interpnans minusmean log	zscore, 2
														ECM	interpnans	zscore, 2
														NH4	interpnans minusmean log	zscore, 2
														NO3	interpnans minusmean log	zscore, 2
														Na	interpnans minusmean log	zscore, 2
8	Neem	368.923	394.308	Output/Neem/Timescale/343.5385-368.9231m/#1	0.015	0	40	368.923	373.619	368.923	394.308	4	2	Ca	interpnans minusmean log	zscore, 2
														ECM	interpnans	zscore, 2
														NH4	interpnans minusmean log	zscore, 2
														NO3	interpnans minusmean log	zscore, 2
														Na	interpnans minusmean log	zscore, 2
9	Neem	394.308	419.692	Output/Neem/Timescale/368.9231-394.3077m/#1	0.015	0	40	394.308	399.026	394.308	419.692	4	2	Ca	interpnans minusmean log	zscore, 2
														ECM	interpnans	zscore, 2
														NH4	interpnans minusmean log	zscore, 2
														NO3	interpnans minusmean log	zscore, 2
														Na	interpnans minusmean log	zscore, 2
10	Neem	419.692	445.077	Output/Neem/Timescale/394.3077-419.6923m/#1	0.015	0	40	419.692	424.492	419.692	445.077	4	2	Ca	interpnans minusmean log	zscore, 2
														ECM	interpnans	zscore, 2
														NH4	interpnans minusmean log	zscore, 2
														NO3	interpnans minusmean log	zscore, 2
														Na	interpnans minusmean log	zscore, 2
11	Neem	445.077	470.462	Output/Neem/Timescale/419.6923-445.0769m/#1	0.015	0	40	445.077	449.837	445.077	470.462	4	2	Ca	interpnans minusmean log	zscore, 2
														ECM	interpnans	zscore, 2
														NH4	interpnans minusmean log	zscore, 2
														NO3	interpnans minusmean log	zscore, 2
														Na	interpnans minusmean log	zscore, 2
12	Neem	470.462	495.846	Output/Neem/Timescale/445.0769-470.4615m/#1	0.015	0	40	470.462	475.206	470.462	495.846	4	2	Ca	interpnans minusmean log	zscore, 2
														ECM	interpnans	zscore, 2
														NH4	interpnans minusmean log	zscore, 2
														NO3	interpnans minusmean log	zscore, 2
														Na	interpnans minusmean log	zscore, 2
13	Neem	495.846	521.231	Output/Neem/Timescale/470.4615-495.8462m/#1	0.015	0	40	495.846	500.718	495.846	521.231	4	2	Ca	interpnans minusmean log	zscore, 2
														ECM	interpnans	zscore, 2
														NH4	interpnans minusmean log	zscore, 2
														NO3	interpnans minusmean log	zscore, 2
														Na	interpnans minusmean log	zscore, 2
14	Neem	521.231	546.615	Output/Neem/Timescale/495.8462-521.2308m/#1	0.015	0	40	521.231	526.031	521.231	546.615	4	2	Ca	interpnans minusmean log	zscore, 2
														ECM	interpnans	zscore, 2
														NH4	interpnans minusmean log	zscore, 2
														NO3	interpnans minusmean log	zscore, 2
														Na	interpnans minusmean log	zscore, 2
15	Neem	546.615	572	Output/Neem/Timescale/521.2308-546.6154m/#1	0.015	0	40	546.615	551.354	546.615	572	4	2	Ca	interpnans minusmean log	zscore, 2
														ECM	interpnans	zscore, 2
														NH4	interpnans minusmean log	zscore, 2
														NO3	interpnans minusmean log	zscore, 2
														Na	interpnans minusmean log	zscore, 2
16	Neem	572	597.333	Output/Neem/Timescale/546.6154-572m/#1	0.015	0	40	572	578.912	572	597.333	4	2	Ca	interpnans minusmean log	zscore, 2
														ECM	interpnans	zscore, 2
														NH4	interpnans minusmean log	zscore, 2
														NO3	interpnans minusmean log	zscore, 2
														Na	interpnans minusmean log	zscore, 2
17	Neem	597.333	622.667	Output/Neem/Timescale/572-597.3333m/#1	0.015	0	40	597.333	603.338	597.333	622.667	4	2	Ca	interpnans minusmean log	zscore, 2
														ECM	interpnans	zscore, 2
														NH4	interpnans minusmean log	zscore, 2
														NO3	interpnans minusmean log	zscore, 2
														Na	interpnans minusmean log	zscore, 2
18	Neem	622.667	648	Output/Neem/Timescale/597.3333-622.6667m/#1	0.015	0	40	622.667	629.636	622.667	648	4	2	Ca	interpnans minusmean log	zscore, 2
														ECM	interpnans	zscore, 2
														NH4	interpnans minusmean log	zscore, 2
														NO3	interpnans minusmean log	zscore, 2
														Na	interpnans minusmean log	zscore, 2
19	Neem	648	673.333	Output/Neem/Timescale/622.6667-648m/#1	0.015	0	40	648	654.77	648	673.333	4	2	Ca	interpnans minusmean log	zscore, 2
														ECM	interpnans	zscore, 2
														NH4	interpnans minusmean log	zscore, 2
														NO3	interpnans minusmean log	zscore, 2
														Na	interpnans minusmean log	zscore, 2
20	Neem	673.333	698.667	Output/Neem/Timescale/648-673.3333m/#1	0.015	0	40	673.333	679.565	673.333	698.667	4	2	Ca	interpnans minusmean log	zscore, 2
														ECM	interpnans	zscore, 2
														NH4	interpnans minusmean log	zscore, 2
														NO3	interpnans minusmean log	zscore, 2
														Na	interpnans minusmean log	zscore, 2
21	Neem	698.667	724	Output/Neem/Timescale/673.3333-698.6667m/#1	0.015	0	40	711.933	715.411	698.667	724	4	2	Ca	interpnans minusmean log	zscore, 2
														ECM	interpnans	zscore, 2
														NH4	interpnans minusmean log	zscore, 2
														NO3	interpnans minusmean log	zscore, 2
														Na	interpnans minusmean log	zscore, 2
22	Neem	724	749.333	Output/Neem/Timescale/698.6667-724m/#1	0.015	0	40	724	728.848	724	749.333	4	2	Ca	interpnans minusmean log	zscore, 2
														ECM	interpnans	zscore, 2
														NH4	interpnans minusmean log	zscore, 2
														NO3	interpnans minusmean log	zscore, 2
														Na	interpnans minusmean log	zscore, 2

## Sheet: NorthGRIP1
NorthGRIP1 GICC21 SC settings (Model.)
Run	icecore	dstart	dend	inputdir0	dx	dx_offset	nLayerBatch	manualtemplates		initialpar		nIter	nTemplate	species	preprocsteps{:,1}	preprocsteps{:,2}
1	Northgrip1	9.8	365	""	0.01	0	50	9.8	365	9.8	365	4	1	Ca_ic	interpnans minusmean log	zscore, 2
														Cl_ic	interpnans minusmean	zscore, 2
														ECM	interpnans minusmean	zscore, 2
														Mg_ic	interpnans minusmean	zscore, 2
														NH4_ic	interpnans minusmean log	zscore, 2
														NO3_ic	interpnans minusmean log	zscore, 2
														Na_ic	interpnans minusmean log	zscore, 2
														SO4_ic	interpnans minusmean	zscore, 2
														d18O	interpnans minusmean	zscore, 2

## Sheet: NorthGRIP2
NorthGRIP2 GICC21 SC settings (Model.)
Run	icecore	dstart	dend	inputdir0	dx	dx_offset	nLayerBatch	manualtemplates		initialpar		nIter	nTemplate	species	preprocsteps{:,1}	preprocsteps{:,2}
1	Northgrip2	159	209	"	0.0155	0	50	165.033	178.381	159	209	4	2	Ca_DRI	log minusmean	zscore, 2
														HNO3_DRI	log minusmean	zscore, 2
														NH4_DRI	log minusmean	zscore, 2
														Na_DRI	log minusmean	zscore, 2
2	Northgrip2	209	350	Output/Northgrip2/Timescale/159-209m/#1	0.015	0	50	209	350	209	350	4	2	Ca_DRI	log minusmean	zscore, 2
														HNO3_DRI	log minusmean	zscore, 2
														NH4_DRI	log minusmean	zscore, 2
														Na_DRI	log minusmean	zscore, 2
3	Northgrip2	350	526	Output/Northgrip2/Timescale/209-350m/#1	0.014	0	50	350	526	350	526	4	2	Ca_DRI	log minusmean	zscore, 2
														HNO3_DRI	log minusmean	zscore, 2
														NH4_DRI	log minusmean	zscore, 2
														Na_DRI	log minusmean	zscore, 2

## Sheet: NEEM-2011-S1
NEEM-2011-S1 GICC21 SC settings (Model.)
Run	icecore	dstart	dend	inputdir0	dx	dx_offset	nLayerBatch	manualtemplates		initialpar		nIter	nTemplate	species	preprocsteps{:,1}	preprocsteps{:,2}
1	NEEM-2011-S1	6	156	"	0.03	0	40	6	39.511	6	156	4	2	BC_b	log minusmean interpnans	zscore, 1
														NH4_b	log minusmean interpnans	zscore, 1
														Na_b	log minusmean interpnans	zscore, 1
														nssCa_b	log minusmean interpnans	zscore, 1
														nssSNa_b	log minusmean interpnans	zscore, 1
2	NEEM-2011-S1	156	182.5	Output/NEEM-2011-S1/Timescale/6-156m/#1	0.0165	0	40	156	167.98	156	182.5	4	2	BC_b	log minusmean interpnans	zscore, 1
														NH4_b	log minusmean interpnans	zscore, 1
														Na_b	log minusmean interpnans	zscore, 1
														nssCa_b	log minusmean interpnans	zscore, 1
														nssSNa_b	log minusmean interpnans	zscore, 1
3	NEEM-2011-S1	182.5	411	Output/NEEM-2011-S1/Timescale/156-182.5m/#1	0.0165	0	40	190.171	210.962	182.5	411	4	2	BC_b	log minusmean interpnans	zscore, 1
														NH4_b	log minusmean interpnans	zscore, 1
														Na_b	log minusmean interpnans	zscore, 1
														nssCa_b	log minusmean interpnans	zscore, 1
														nssSNa_b	log minusmean interpnans	zscore, 1

## Sheet: GRIP
GRIP GICC21 SC settings (Model.)
Run	icecore	dstart	dend	inputdir0	dx	dx_offset	nLayerBatch	manualtemplates		initialpar		nIter	nTemplate	species	preprocsteps{:,1}	preprocsteps{:,2}
1	GRIP	5	100	"	0.03	0	50	5	28.78	5	100	4	2	ECM	minusmean	zscore, 25
														d18O	minusmean	zscore, 25
														d18O_deconv	minusmean	zscore, 25
2	GRIP	100	200	Output/GRIP/Timescale/5-100m/#2	0.03	0	50	105.356	118.841	100	200	4	2	ECM	minusmean	zscore, 25
														d18O	minusmean	zscore, 25
														d18O_deconv	minusmean	zscore, 25
3	GRIP	200	300	Output/GRIP/Timescale/100-200m/#2	0.03	0	50	205.315	220.854	200	300	4	2	ECM	minusmean	zscore, 25
														d18O	minusmean	zscore, 25
														d18O_deconv	minusmean	zscore, 25
4	GRIP	300	700	Output/GRIP/Timescale/200-300m/#2	0.0165	0	50	300	314.193	300	700	4	2	ECM	minusmean	zscore, 25
														d18O	minusmean	zscore, 25
														d18O_deconv	minusmean	zscore, 25
5	GRIP	700	800	Output/GRIP/Timescale/300-700m/#1	0.01245	0	50	700	705.853	700	800	4	2	ECM	minusmean	zscore, 25
														d18O	minusmean	zscore, 25
														d18O_deconv	minusmean	zscore, 25

## Sheet: DYE-3
DYE-3 GICC21 SC settings (Model.)
Run	icecore	dstart	dend	inputdir0	dx	dx_offset	nLayerBatch	manualtemplates	initialpar	nIter	nTemplate	species	preprocsteps{:,1}	preprocsteps{:,2}
1	DYE-3	0	130	""	0.0525	0	40	0 130	0 130	4	2	d18O	minusmean	zscore, 25
2	DYE-3	130	230	""	0.036	0	50	130 230	130 230	4	2	ECM	minusmean	zscore, 25
												d18O	minusmean	zscore, 25
3	DYE-3	230	330	Output/DYE3/Timescale/130-230m/#1	0.035	0	50	230 330	230 330	4	2	ECM	minusmean	zscore, 25
												d18O	minusmean	zscore, 25
4	DYE-3	330	430	Output/DYE3/Timescale/230-330m/#1	0.0325	0	50	330 430	330 430	4	2	ECM	minusmean	zscore, 25
												d18O	minusmean	zscore, 25
5	DYE-3	430	1600	Output/DYE3/Timescale/330-430m/#1	0.0121	0	40	430 1600	430 1600	4	2	ECM	minusmean	zscore, 25
												d18O	minusmean	zscore, 25
