# Supplementary material for: A multi-ice-core, annual-layer-counted Greenland ice-core chronology for the last 3800 years: GICC21
Source: Copernicus journal article supplement (doi:10.5194/cp-2021-155), 2021-11-17
Supplement: Supplementary file [file cp-2021-155-AC2-supplement.pdf]

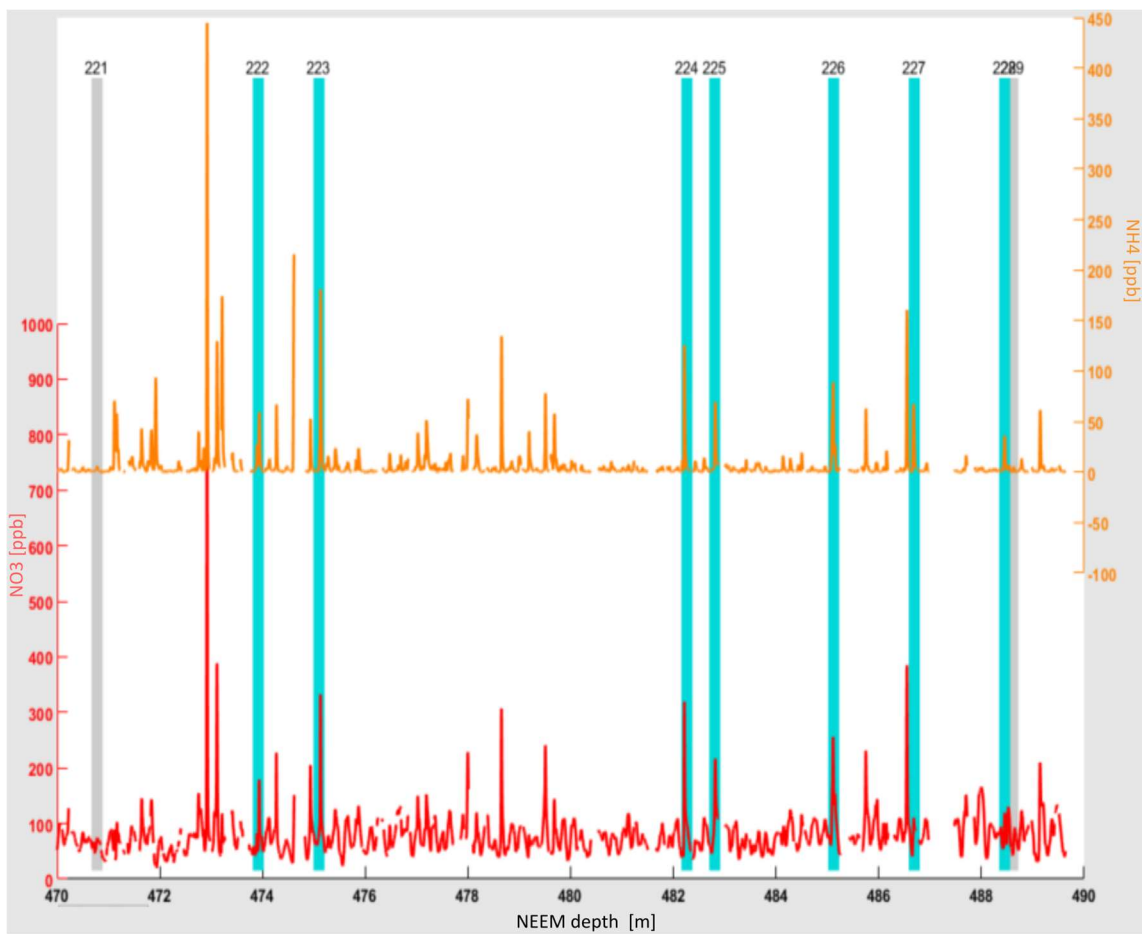

Figure 1 Example of the co-occurrence of  $\text{NH}_4^+$  and  $\text{NO}_3^-$  peaks in the NEEM ice cores.

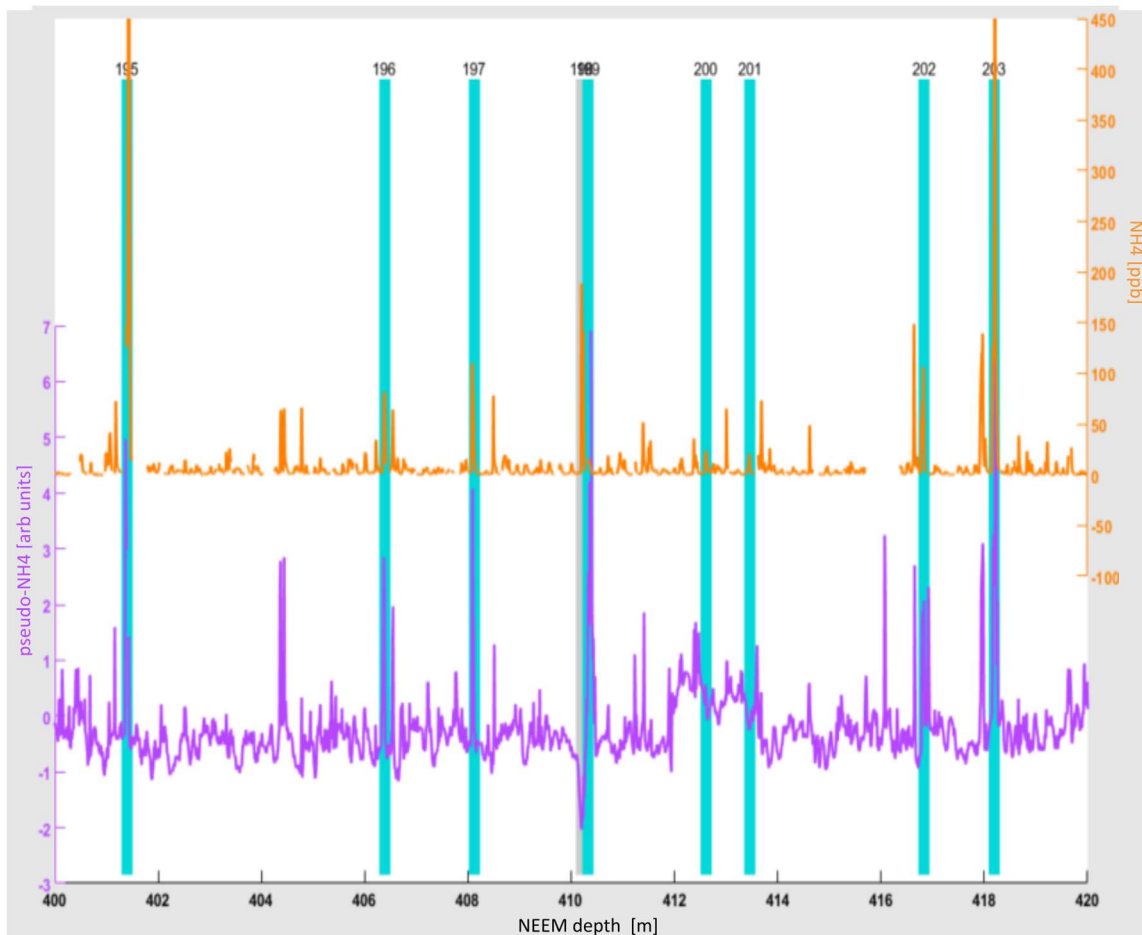

Figure 2 Alignment of log-inverted ECM (pseudo- $\text{NH}_4^+$ ) peaks and true  $\text{NH}_4^+$  peaks in the NEEM ice core.
