# Supplementary material for: A multi-ice-core, annual-layer-counted Greenland ice-core chronology for the last 3800 years: GICC21
Source: Copernicus journal article supplement (doi:10.5194/cp-2021-155), 2021-11-17
Supplement: Supplementary file [file cp-2021-155-AC5-supplement.pdf]

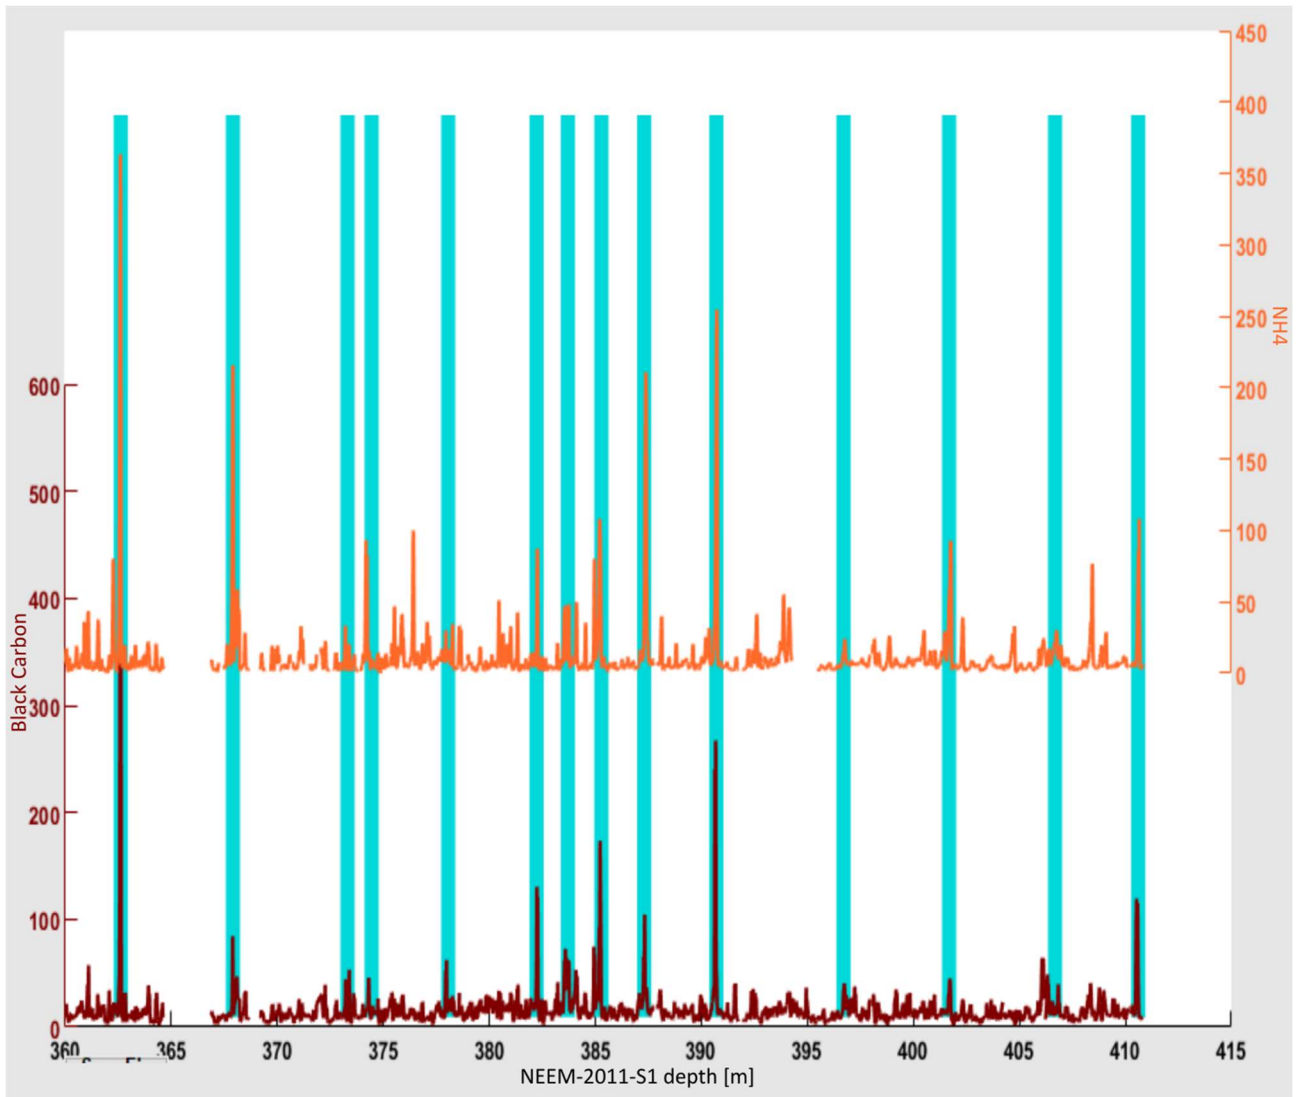

Figure 1 NEEM-2011-S1 Black Carbon and  $\text{NH}_4^+$  comparison. The blue bars are not GICC21 tie-points but merely indicate the co-occurrence of  $\text{NH}_4^+$  peaks with BC peaks.
